# Supplementary material
Source: Elsevier journal article supplement (https://lshtm-eprints-repo-prod.lshtm-eprints.cdl.cosector.com/159/1/mmc16.pdf)
Supplement: mmc16 [file mmc16.pdf]

| Code | Group | Demographics |         |           |                  |       |                       |                     |
|------|-------|--------------|---------|-----------|------------------|-------|-----------------------|---------------------|
|      |       | Gender       | Age     | Education | Disease duration | MMSE  | Current medication    | Tone deaf?<br>(Y/N) |
|      |       |              | (years) | (years)   | (years)          | (raw) |                       |                     |
| 1    | AD    | F            | 49      | 10        | 4.8              | 14    | Donepezil 10mg nocte  | N                   |
| 2    | AD    | M            | 53      | 10        | 3.9              | 23    | Donepezil 10mg nocte  | N                   |
| 3    | AD    | M            | 56      | 16        | 3.4              | 28    | Rivastigmine 6mg b.d. | N                   |
| 4    | AD    | M            | 60      | 13        | 5.1              | 24    | Donepezil 10mg nocte  | N                   |
| 5    | AD    | F            | 60      | 14        | 6.9              | 15    | Donepezil 10mg nocte  | N                   |
| 6    | AD    | F            | 60      | 17        | 2.1              | 27    | Donepezil 10mg nocte  | N                   |
| 7    | AD    | F            | 62      | 16        | 5.0              | 18    | Donepezil 10mg nocte  | N                   |
| 8    | AD    | F            | 62      | 16        | 8.0              | 26    | Donepezil 10mg nocte  | N                   |
| 9    | AD    | F            | 63      | 10        | 4.3              | 23    | Donepezil 10mg nocte  | N                   |
| 10   | AD    | F            | 64      | 10        | 3.9              | 22    | Donepezil 10mg nocte  | N                   |
| 11   | AD    | F            | 64      | 11        | 8.1              | 19    | Donepezil 10mg nocte  | N                   |
| 12   | AD    | F            | 65      | 11        | 4.0              | 23    | Donepezil 10mg nocte  | N                   |
| 13   | AD    | M            | 65      | 13        | 5.0              | 25    | Donepezil 10mg nocte  | N                   |
| 14   | AD    | F            | 66      | 17        | 4.5              | 25    | Donepezil 10mg nocte  | N                   |
| 15   | AD    | M            | 67      | 16        | 11.5             | 21    | Memantine 10mg b.d.   | N                   |
| 16   | AD    | M            | 70      | 18        | 11.7             | 28    | Donepezil 10mg nocte  | N                   |
| 17   | AD    | M            | 71      | 17        | 6.3              | 14    | Memantine 10mg b.d.   | N                   |
| 18   | AD    | F            | 76      | 11        | 8.8              | 23    | none                  | N                   |
| 19   | AD    | F            | 77      | 17        | 4.8              | 25    | Donepezil 5mg nocte   | N                   |
| 20   | AD    | M            | 80      | 9         | 6.6              | 22    | Donepezil 10mg nocte  | N                   |
| 21   | AD    | M            | 76      | 12        | 5.9              | 19    | Donepezil 10mg nocte  | N                   |
| 22   | PNFA  | F            | 59      | 16        | 6.0              | 14    | none                  | N                   |
| 23   | PNFA  | F            | 66      | 10        | 2.8              | 15    | none                  | N                   |
| 24   | PNFA  | F            | 67      | 10        | 4.0              | 19    | none                  | N                   |
| 25   | PNFA  | F            | 72      | 17        | 4.3              | 26    | none                  | N                   |
| 26   | PNFA  | F            | 77      | 10        | 4.3              | 22    | none                  | N                   |
| 27   | LPA   | M            | 57      | 14        | 3.9              | 11    | none                  | N                   |
| 28   | LPA   | M            | 62      | 13        | 2.8              | 6     | Donepezil 10mg nocte  | N                   |
| 29   | LPA   | M            | 62      | 11        | 3.8              | 13    | Donepezil 10mg nocte  | N                   |
| 30   | LPA   | M            | 64      | 10        | 4.0              | 6     | Donepezil 10mg nocte  | N                   |
| 31   | LPA   | F            | 64      | 11        | 3.9              | 5     | none                  | N                   |
| 32   | LPA   | F            | 69      | 10        | 5.8              | 10    | none                  | N                   |
| 33   | LPA   | M            | 72      | 10        | 4.7              | 15    | none                  | N                   |
| 34   | GAA   | M            | 65      | 12        | 3.3              | 0/29  | none                  | N                   |

| Code | Group | Background neuropsychology |     |      |             |             |        |            |                 |                 |               |                       |                       |                        |                         |                          |            |
|------|-------|----------------------------|-----|------|-------------|-------------|--------|------------|-----------------|-----------------|---------------|-----------------------|-----------------------|------------------------|-------------------------|--------------------------|------------|
|      |       | VIQ                        | PIQ | BPVS | RMT (words) | RMT (faces) | Naming | Arithmetic | Object decision | Stroop (colour) | Stroop (word) | Stroop (interference) | Digit span (forwards) | Digit span (backwards) | Spatial span (forwards) | Spatial span (backwards) | Repetition |
|      |       | (IQ)                       |     |      | (Z score)   |             |        |            |                 |                 |               |                       |                       |                        |                         |                          | (raw)      |
| 1    | AD    | 98                         | 62  | 120  | -1.7        | -1.7        | -1.3   | -2.3       | -1.7            | -3.0            | -3.0          | uta                   | -1.8                  | -1.7                   | -2.7                    | -2.3                     | na         |
| 2    | AD    | 78                         | 58  | 67   | -0.7        | -1.7        | -1.7   | -2.0       | -1.7            | -3.0            | -3.0          | -3.0                  | -1.8                  | -1.7                   | -3.0                    | -2.3                     | na         |
| 3    | AD    | 108                        | 91  | 112  | 0.0         | -1.3        | 1.5    | 0.4        | 3.0             | 1.0             | 1.0           | 1.0                   | 2.3                   | 1.5                    | -1.3                    | -0.3                     | na         |
| 4    | AD    | 119                        | 116 | 120  | -1.7        | -1.7        | 2.3    | -0.8       | -0.7            | -1.7            | -0.3          | -0.7                  | -1.7                  | -1.5                   | -1.7                    | -1.3                     | na         |
| 5    | AD    | 67                         | 63  | 120  | -1.7        | -1.7        | -2.7   | -2.3       | -1.7            | -3.0            | -3.0          | -3.0                  | -1.7                  | -2.7                   | -2.7                    | -3.0                     | na         |
| 6    | AD    | 88                         | 67  | 100  | -0.7        | -1.7        | -1.7   | -2.3       | -2.3            | -3.0            | -3.0          | -3.0                  | 0.0                   | -1.5                   | -2.7                    | -2.3                     | na         |
| 7    | AD    | 94                         | 62  | 104  | -1.7        | -1.7        | -1.7   | -2.3       | -0.7            | -3.0            | -3.0          | uta                   | -1.0                  | -2.7                   | -2.7                    | -3.0                     | na         |
| 8    | AD    | 130                        | 118 | 127  | -1.7        | -0.7        | 0.7    | 0.6        | 0.7             | 0.3             | 0.7           | -1.0                  | 1.5                   | 1.0                    | 0.0                     | 0.0                      | na         |
| 9    | AD    | 106                        | 99  | 96   | -1.7        | -1.3        | -1.3   | -1.0       | 0.7             | -1.7            | -1.0          | -1.3                  | 0.0                   | -1.0                   | -1.7                    | 0.0                      | na         |
| 10   | AD    | 98                         | 81  | 109  | -1.7        | -1.7        | -1.7   | -1.4       | -0.3            | -3.0            | -1.3          | -1.0                  | 0.0                   | -0.7                   | -0.3                    | -0.7                     | na         |
| 11   | AD    | 109                        | 97  | 120  | -1.7        | -1.7        | 0.7    | 0.0        | 0.7             | 0.3             | 0.7           | 0.3                   | 0.0                   | 1.5                    | -0.3                    | -1.3                     | na         |
| 12   | AD    | 106                        | 63  | 64   | -1.7        | -1.7        | -2.7   | -1.0       | -2.3            | -0.7            | -1.3          | -1.3                  | 0.0                   | 1.3                    | 0.7                     | -0.7                     | na         |
| 13   | AD    | 101                        | 85  | 127  | -1.7        | -0.7        | -0.7   | -0.6       | -0.7            | -0.7            | 0.3           | -1.7                  | 1.3                   | 0.6                    | 1.0                     | -1.3                     | na         |
| 14   | AD    | 121                        | 109 | 120  | -1.7        | -1.7        | 0.0    | -0.4       | -0.3            | -0.3            | -0.3          | -0.3                  | 0.8                   | 1.7                    | 0.0                     | 0.0                      | na         |
| 15   | AD    | 118                        | 105 | 120  | -1.7        | -0.7        | 0.0    | -0.8       | -1.3            | 0.7             | -3.0          | -2.3                  | -1.7                  | 0.3                    | -1.0                    | -1.3                     | na         |
| 16   | AD    | 116                        | 97  | 127  | 0.7         | 0.0         | 1.5    | -1.0       | 0.7             | -0.7            | 0.3           | -1.3                  | 1.5                   | -0.7                   | -1.7                    | -0.3                     | na         |
| 17   | AD    | 70                         | 75  | 112  | -1.3        | 0.7         | -1.7   | -2.3       | 0.3             | -3.0            | -3.0          | -3.0                  | 0.6                   | -0.3                   | -2.3                    | -3.0                     | na         |
| 18   | AD    | 88                         | 92  | 104  | -1.7        | -1.7        | -1.7   | -0.6       | 0.3             | -1.3            | -0.7          | -3.0                  | 0.3                   | 0.7                    | -0.7                    | -1.0                     | na         |
| 19   | AD    | 109                        | 110 | 112  | -1.7        | -1.7        | -1.7   | 0.2        | 0.3             | -1.0            | 1.0           | -0.3                  | 0.8                   | 0.7                    | 0.7                     | -1.0                     | na         |
| 20   | AD    | 86                         | 85  | 98   | -1.3        | -0.7        | -2.7   | -1.6       | -0.7            | -3.0            | -3.0          | uta                   | 0.6                   | -1.3                   | -1.0                    | -1.0                     | na         |
| 21   | AD    | 113                        | 99  | 120  | -1.7        | -1.7        | 0.0    | -1.2       | -0.3            | -2.7            | -1.0          | -2.3                  | 0.6                   | -1.3                   | -0.7                    | -0.3                     | na         |
| 22   | PNFA  | 55                         | 70  | 54   | -0.7        | -1.7        | -2.7   | -2.2       | -0.7            | -3.0            | -3.0          | uta                   | -1.7                  | -2.7                   | -1.7                    | -2.3                     | 1          |
| 23   | PNFA  | 55                         | 100 | 41   | -1.7        | -0.7        | -2.7   | -0.8       | 0.3             | -0.3            | -0.3          | -2.7                  | -2.7                  | -1.7                   | -1.0                    | -0.7                     | 0          |
| 24   | PNFA  | 55                         | 71  | 98   | 0.7         | 0.0         | -2.7   | -2.3       | -1.7            | -3.0            | -3.0          | uta                   | -0.7                  | -1.7                   | -1.7                    | -1.7                     | 20         |
| 25   | PNFA  | 90                         | 86  | 102  | 0.0         | -1.3        | 0.7    | -1.2       | 0.7             | -3.0            | -3.0          | -3.0                  | 0.8                   | -0.3                   | -0.7                    | 0.7                      | 9          |
| 26   | PNFA  | 70                         | 79  | 112  | -1.7        | -1.7        | -1.7   | -2.3       | -2.3            | -3.0            | -3.0          | uta                   | -0.8                  | -2.3                   | -1.7                    | -1.7                     | na         |
| 27   | LPA   | 55                         | 76  | 41   | -1.7        | -1.7        | -2.7   | -2.3       | -1.7            | uta             | uta           | uta                   | 0.6                   | -1.0                   | -2.3                    | -2.3                     | 19         |
| 28   | LPA   | 55                         | 62  | 41   | -1.7        | -1.7        | -2.7   | -2.3       | 0.7             | uta             | uta           | uta                   | -1.7                  | -2.7                   | -2.7                    | -3.0                     | 18         |
| 29   | LPA   | 55                         | 66  | 41   | -1.7        | -1.7        | -2.7   | -2.3       | -2.3            | uta             | uta           | uta                   | -1.7                  | -2.7                   | -2.7                    | -2.3                     | na         |
| 30   | LPA   | 55                         | 71  | 41   | -1.7        | -1.7        | -2.7   | -2.3       | 0.7             | uta             | uta           | uta                   | -1.7                  | -1.5                   | -3.0                    | -3.0                     | 15         |
| 31   | LPA   | 55                         | 65  | 81   | -1.7        | -1.7        | -2.7   | -2.3       | -0.3            | uta             | uta           | uta                   | -1.7                  | -1.5                   | -2.0                    | -2.7                     | 20         |
| 32   | LPA   | 69                         | 69  | 41   | -1.7        | -1.7        | -2.7   | -2.3       | -1.7            | -3.0            | -3.0          | -3.0                  | -0.7                  | -1.7                   | -1.7                    | -2.7                     | 20         |
| 33   | LPA   | 72                         | 73  | 90   | -1.7        | -1.7        | -2.7   | -2.2       | 0.3             | -3.0            | -3.0          | -3.0                  | -2.3                  | -2.3                   | -1.7                    | -2.3                     | na         |
| 34   | GAA   | 55                         | 95  | 112  | -1.7        | -1.3        | -2.3   | -2.3       | 3.0             | uta             | uta           | uta                   | -2.7                  | -1.7                   | -1.0                    | -0.7                     | 17         |

| Code |      | Group |    | Experimental auditory tests |                   |        |                 |                   |              |          |                   |                                |           |                 |                   |              |          |
|------|------|-------|----|-----------------------------|-------------------|--------|-----------------|-------------------|--------------|----------|-------------------|--------------------------------|-----------|-----------------|-------------------|--------------|----------|
|      |      |       |    | Pitch (detection)           | Pitch (direction) | Timbre | Size (familiar) | Size (unfamiliar) | Apperceptive | Semantic | Pitch (detection) | Pitch (direction) <sup>1</sup> | Timbre    | Size (familiar) | Size (unfamiliar) | Apperceptive | Semantic |
|      |      |       |    | raw (/20)                   |                   |        |                 |                   | raw (/40)    |          |                   |                                | (Z score) |                 |                   |              |          |
| 1    | AD   | 20    | 20 | 20                          | 20                | 18     | 28              | 39                | 0.3          | -        | 0.5               | 0.2                            | -1.5      | -3.5            | 0.5               |              |          |
| 2    | AD   | 20    | 20 | 20                          | 20                | 20     | 32              | 38                | 0.3          | -        | 0.5               | 0.2                            | 0.3       | -2.0            | -0.4              |              |          |
| 3    | AD   | 20    | 20 | 20                          | 20                | 20     | 30              | 38                | 0.3          | -        | 0.5               | 0.2                            | 0.3       | -2.8            | -0.4              |              |          |
| 4    | AD   | 20    | 20 | 16                          | 20                | 20     | 39              | 39                | 0.3          | -        | -4.5              | 0.2                            | 0.3       | 0.7             | 0.5               |              |          |
| 5    | AD   | 15    | 19 | 19                          | 19                | 14     | 37              | 34                | -12.3        | -        | -0.8              | -1.8                           | -5.2      | -0.1            | -4.0              |              |          |
| 6    | AD   | 18    | 18 | 19                          | 16                | 20     | 25              | 39                | -4.8         | -        | -0.8              | -7.8                           | 0.3       | -4.7            | 0.5               |              |          |
| 7    | AD   | 20    | 15 | 20                          | 17                | 14     | 23              | 33                | 0.3          | -        | 0.5               | -5.8                           | -5.2      | -5.5            | -4.9              |              |          |
| 8    | AD   | 20    | 20 | 20                          | 20                | 20     | 33              | 38                | 0.3          | -        | 0.5               | 0.2                            | 0.3       | -1.6            | -0.4              |              |          |
| 9    | AD   | 18    | 12 | 14                          | 20                | 19     | 27              | 40                | -4.8         | -        | -7.0              | 0.2                            | -0.6      | -3.9            | 1.5               |              |          |
| 10   | AD   | 20    | 20 | 19                          | 20                | 20     | 35              | 37                | 0.3          | -        | -0.8              | 0.2                            | 0.3       | -0.8            | -1.3              |              |          |
| 11   | AD   | 20    | 18 | 20                          | 20                | 20     | 37              | 39                | 0.3          | -        | 0.5               | 0.2                            | 0.3       | -0.1            | 0.5               |              |          |
| 12   | AD   | 20    | 20 | 20                          | 18                | 16     | 21              | 36                | 0.3          | -        | 0.5               | -3.8                           | -3.4      | -6.2            | -2.2              |              |          |
| 13   | AD   | 17    | 19 | 20                          | 20                | 20     | 31              | 37                | -7.3         | -        | 0.5               | 0.2                            | 0.3       | -2.4            | -1.3              |              |          |
| 14   | AD   | 20    | 20 | 20                          | 20                | 20     | 33              | 39                | 0.3          | -        | 0.5               | 0.2                            | 0.3       | -1.6            | 0.5               |              |          |
| 15   | AD   | 20    | 20 | 20                          | 20                | 16     | 26              | 40                | 0.3          | -        | 0.5               | 0.2                            | -3.4      | -4.3            | 1.5               |              |          |
| 16   | AD   | 20    | 20 | 16                          | 17                | 15     | 32              | 36                | 0.3          | -        | -4.5              | -5.8                           | -4.3      | -2.0            | -2.2              |              |          |
| 17   | AD   | 20    | 20 | 20                          | 20                | 20     | 38              | 40                | 0.3          | -        | 0.5               | 0.2                            | 0.3       | 0.3             | 1.5               |              |          |
| 18   | AD   | 13    | 17 | 16                          | 14                | 8      | 38              | 32                | -17.3        | -        | -4.5              | -11.8                          | -10.6     | 0.3             | -5.8              |              |          |
| 19   | AD   | 20    | 20 | 20                          | 20                | 20     | 36              | 38                | 0.3          | -        | 0.5               | 0.2                            | 0.3       | -0.5            | -0.4              |              |          |
| 20   | AD   | 20    | 20 | 20                          | 20                | 20     | 40              | 37                | 0.3          | -        | 0.5               | 0.2                            | 0.3       | 1.1             | -1.3              |              |          |
| 21   | AD   | 18    | 18 | 16                          | 20                | 17     | 32              | 31                | -4.8         | -        | -4.5              | 0.2                            | -2.5      | -2.0            | -6.7              |              |          |
| 22   | PNFA | 10    | 13 | 12                          | 14                | 15     | 29              | 30                | -24.8        | -        | -9.5              | -11.8                          | -4.3      | -3.2            | -7.6              |              |          |
| 23   | PNFA | 16    | 16 | 11                          | 18                | 20     | 39              | 26                | -9.8         | -        | -10.8             | -3.8                           | 0.3       | 0.7             | -11.3             |              |          |
| 24   | PNFA | 20    | 17 | 16                          | 20                | 20     | 27              | 35                | 0.3          | -        | -4.5              | 0.2                            | 0.3       | -3.9            | -3.1              |              |          |
| 25   | PNFA | 20    | 20 | 20                          | 20                | 20     | 37              | 35                | 0.3          | -        | 0.5               | 0.2                            | 0.3       | -0.1            | -3.1              |              |          |
| 26   | PNFA | 20    | 20 | 19                          | 20                | 20     | 39              | 33                | 0.3          | -        | -0.8              | 0.2                            | 0.3       | 0.7             | -4.9              |              |          |
| 27   | LPA  | 18    | 19 | 19                          | 12                | 5      | 32              | 30                | -4.8         | -        | -0.8              | -15.8                          | -13.4     | -2.0            | -7.6              |              |          |
| 28   | LPA  | 13    | 10 | 11                          | 17                |        | 21              | 29                | -17.3        | -        | -10.8             | -5.8                           | -17.9     | -6.2            | -8.5              |              |          |
| 29   | LPA  | 16    | 19 | 16                          | 19                | 11     | 25              | 40                | -9.8         | -        | -4.5              | -1.8                           | -7.9      | -4.7            | 1.5               |              |          |
| 30   | LPA  | 20    | 20 | 13                          | 11                | 11     | 38              | 28                | 0.3          | -        | -8.3              | -17.8                          | -7.9      | 0.3             | -9.5              |              |          |
| 31   | LPA  | 19    | 18 | 19                          | 20                | 20     | 37              | 36                | -2.3         | -        | -0.8              | 0.2                            | 0.3       | -0.1            | -2.2              |              |          |
| 32   | LPA  | 11    | 17 | 18                          | 20                | 17     | 35              | 35                | -22.3        | -        | -2.0              | 0.2                            | -2.5      | -0.8            | -3.1              |              |          |
| 33   | LPA  | 20    | 20 | 20                          | 19                | 19     | 31              | 29                | 0.3          | -        | 0.5               | -1.8                           | -0.6      | -2.4            | -8.5              |              |          |
| 34   | GAA  | 20    | 18 | 18                          | 20                | 20     | 31              | 40                | 0.3          | -        | -2.0              | 0.2                            | 0.3       | -2.4            | 1.5               |              |          |

| Code | Group | Regional brain atrophy (see legend) |     |    |     |     |          | Peripheral hearing |    |    |    |    |                         |
|------|-------|-------------------------------------|-----|----|-----|-----|----------|--------------------|----|----|----|----|-------------------------|
|      |       | HG                                  | STG | PT | iTL | mTL | Parietal | 0.5                | 1  | 2  | 3  | 4  | Unilateral hearing loss |
|      |       |                                     |     |    |     |     |          | (kHz)              |    |    |    |    |                         |
| 1    | AD    |                                     | +   | +  | +   | +   | +        | N                  | N  | N  | N  | N  |                         |
| 2    | AD    |                                     | +   | +  | +   | +   | +        | N                  | N  | N  | N  | N  |                         |
| 3    | AD    |                                     | L   | L  | L   | L   | +        | N                  | N  | N  | N  | N  |                         |
| 4    | AD    |                                     | L   | L  |     |     |          | N                  | N  | N  | N  | N  |                         |
| 5    | AD    |                                     | +   | +  | +   | +   | +        | N                  | N  | N  | N  | N  |                         |
| 6    | AD    |                                     | L   | L  |     | L   | +        | N                  | N  | N  | N  | N  |                         |
| 7    | AD    |                                     | +   | +  | +   | +   | +        | N                  | N  | AN | N  | AN |                         |
| 8    | AD    |                                     | +   | +  | +   | +   | +        | N                  | N  | N  | N  | N  |                         |
| 9    | AD    |                                     | +   | +  | +   | +   | +        | N                  | N  | N  | N  | N  |                         |
| 10   | AD    |                                     |     |    |     | +   |          | N                  | N  | AN | AN | AN | right-sided             |
| 11   | AD    | +                                   | +   | +  | +   | +   | +        | N                  | N  | N  | N  | AN |                         |
| 12   | AD    | +                                   | +   | +  | +   | +   | +        | N                  | N  | N  | N  | N  |                         |
| 13   | AD    | L                                   | +   | L  | +   | +   | +        | N                  | N  | N  | N  | N  |                         |
| 14   | AD    |                                     |     |    |     | +   | +        | N                  | N  | N  | N  | N  |                         |
| 15   | AD    |                                     | +   |    |     | +   | +        | N                  | N  | N  | N  | N  |                         |
| 16   | AD    |                                     | +   | +  | +   | +   | +        | N                  | N  | N  | N  | AN |                         |
| 17   | AD    | +                                   | +   | +  | +   | +   | +        | N                  | N  | N  | N  | AN |                         |
| 18   | AD    |                                     | +   | +  | +   | +   | +        | N                  | N  | N  | AN | AN |                         |
| 19   | AD    | +                                   | +   | +  | +   | +   | +        | N                  | N  | N  | N  | AN |                         |
| 20   | AD    | +                                   | +   | +  | +   | +   | +        | N                  | N  | N  | N  | N  |                         |
| 21   | AD    | ns                                  | ns  | ns | ns  | ns  | ns       | N                  | N  | N  | N  | N  |                         |
| 22   | PNFA  |                                     | +   | +  | +   | +   | +        | N                  | N  | N  | N  | AN |                         |
| 23   | PNFA  | L                                   | L   | L  | L   | L   | +        | N                  | N  | N  | N  | N  |                         |
| 24   | PNFA  |                                     | +   | +  | +   | +   | +        | N                  | N  | N  | N  | N  |                         |
| 25   | PNFA  |                                     | +   | +  | +   | +   | +        | N                  | N  | N  | N  | N  |                         |
| 26   | PNFA  |                                     | +   | +  | +   | +   | +        | AN                 | AN | N  | AN | AN |                         |
| 27   | LPA   |                                     | L   | L  | L   | L   | L        | N                  | N  | N  | N  | N  |                         |
| 28   | LPA   |                                     | +   | +  | +   | +   | +        | N                  | N  | N  | N  | N  |                         |
| 29   | LPA   |                                     | L   | L  | L   | L   | L        | AN                 | AN | AN | N  | N  |                         |
| 30   | LPA   |                                     | +   | +  | +   | +   | +        | N                  | AN | N  | N  | AN |                         |
| 31   | LPA   |                                     | L   | +  | L   | +   | +        | N                  | N  | N  | N  | N  |                         |
| 32   | LPA   |                                     | L   | L  | L   | L   | +        | N                  | N  | N  | N  | N  |                         |
| 33   | LPA   |                                     | +   | +  |     | +   | +        | N                  | N  | N  | AN | N  |                         |
| 34   | GAA   |                                     | L   | L  | L   | L   | L        | N                  | N  | na | na | na |                         |

## Key

|             |                                                                                       |
|-------------|---------------------------------------------------------------------------------------|
| <b>1</b>    | Cannot calculate Z scores due to a lack of variability in the control sample          |
| <b>+</b>    | Bilateral atrophy with no strong asymmetry                                            |
| <b>AD</b>   | Alzheimer's disease                                                                   |
| <b>AN</b>   | Abnormal hearing at indicated frequency level (using normative data from Davis, 1995) |
| <b>BPVS</b> | British Picture Vocabulary Scale (word-picture naming; Dunn et al., 1982)             |
| <b>GAA</b>  | progranulin-associated aphasia                                                        |
| <b>HG</b>   | Heschl's gyrus                                                                        |
| <b>iTL</b>  | inferior and middle temporal lobe                                                     |
| <b>L</b>    | Bilateral atrophy with more severe damage in the left hemisphere                      |
| <b>LPA</b>  | Logopenic (phonological) aphasia                                                      |
| <b>mTL</b>  | mesial temporal lobe                                                                  |
| <b>N</b>    | Normal hearing at indicated frequency level (using normative data from Davis, 1995)   |
| <b>na</b>   | not administered                                                                      |
| <b>ns</b>   | no scan                                                                               |
| <b>PIQ</b>  | performance IQ                                                                        |
| <b>PNFA</b> | progressive non-fluent aphasia                                                        |
| <b>PT</b>   | planum temporale                                                                      |
| <b>RMT</b>  | Recognition memory test (Warrington, 1984)                                            |
| <b>STG</b>  | superior temporal gyrus (anterior to HG)                                              |
| <b>uta</b>  | unable to attempt                                                                     |
| <b>VIQ</b>  | verbal IQ                                                                             |

## Legend (Regional brain atrophy)

All MRI scans were assessed visually by a cognitive neurologist with extensive MRI experience (JW), who was blinded to patients' clinical diagnoses and auditory performance. Six key cerebral regions implicated in auditory processing (Heschl's gyrus, planum temporale, superior temporal gyrus anterior to Heschl's gyrus, inferior temporal lobe, mesial temporal lobe, parietal lobe) were rated as either: unaffected (blank cell); atrophied bilaterally with no strong asymmetry (+); atrophied bilaterally with more severe damage in the left or right hemisphere (L or R).

## Reference

Davis, A. (1995). Hearing in adults: the prevalence and distribution of hearing impairment and reported hearing disability in the MRC Institute of Hearing Research's National Study of Hearing. London: Whurr Publishers.
